# Supplementary material for: Septipyridines as conformationally controlled substitutes for inaccessible bis(terpyridine)-derived oligopyridines in two-dimensional self-assembly
Source: publisher site journal article supplement (doi:10.3762/bjnano.2.46), 2011-07-26
Supplement: Additional file 1 [file 2190-4286-2-46-S1.pdf]

## **Supporting Information**

for

### **Septipyridines as conformationally controlled substitutes for inaccessible bis(terpyridine)-derived oligopyridines in two-dimensional self-assembly**

Daniel Caterbow<sup>1</sup>, Daniela Künzel<sup>2</sup>, Michael G. Mavros<sup>1</sup>, Axel Groß<sup>2</sup>, Katharina Landfester<sup>3</sup>  
and Ulrich Ziener<sup>\*1</sup>

Address: <sup>1</sup>Institute of Organic Chemistry III/Macromolecular Chemistry, <sup>2</sup>Institute of Theoretical Chemistry, University of Ulm, Albert-Einstein-Allee 11, D-89081 Ulm, Germany and <sup>3</sup>Max Planck Institute for Polymer Research, Ackermannweg 10, D-55128 Mainz, Germany

Email: Ulrich Ziener\* - ulrich.ziener@uni-ulm.de

\*Corresponding author

## **Experimental details**

## Synthesis

### General

Phenylpyrimidine bis(pyridinium iodine) salt **7** [1], the diazachalcones **6**, and **8-11** [2,3] and tributyl(1-ethoxyvinyl)stannane [4] were prepared according to the literature. 2-Pyridinecarbaldehyde (98%+), iodine (100%), Na<sub>2</sub>CO<sub>3</sub> (99%), and methanol (99.9%+) from Merck, NH<sub>4</sub>OAc (99%) from VWR, copper(I) oxide (97%) and MgSO<sub>4</sub> (97%) from Acros, isoamylnitrite (97%) and 2,6-dichloro-4-aminopyridine (97%) from Alfa Aesar, Pd(PPh<sub>3</sub>)<sub>4</sub> (99.9%) from Strem, 2-acetylpyridine (98%+) and KF (99%) from Fluka, and 1,2,4-trichlorobenzene (TCB) (+99%) from Aldrich were used as received. When water-free solvents were employed, they were dried according to the literature [5]. The other reagents and solvents were used without further purification. The NMR data were obtained on a Bruker DRX 400 and DRX 500 spectrometer, calibrated against the solvent signal (CDCl<sub>3</sub>: <sup>1</sup>H NMR:  $\delta = 7.27$ ; <sup>13</sup>C NMR:  $\delta = 77.0$ ; [D<sub>6</sub>]DMSO: <sup>1</sup>H NMR:  $\delta = 2.50$ ; [D<sub>2</sub>]1,1,2,2-tetrachloroethane: <sup>1</sup>H NMR:  $\delta = 6.00$ ; <sup>13</sup>C NMR:  $\delta = 74.2$ ) and are given in ppm. The assignment of the <sup>1</sup>H NMR signals is made by comparison with similar compounds described in [1,6], increment calculations, and simulations of the spectra with ACD/HNMR Predictor, Version 3.00, 1997.

### 2,2'-BTP (**5**).

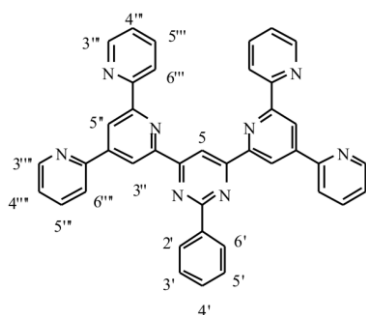

2-Acetylpyridine (3.53 g, 33.0 mmol) and 2-pyridinecarbaldehyde (4.00 g, 33.0 mmol) were added dropwise to a 25 wt % Na<sub>2</sub>CO<sub>3</sub> solution (100 mL) and stirred for 1 h at 70 °C. After cooling down the solid precipitate was filtered off and dried under vacuum at rt. The resulting chalcone **6** was obtained as a brown solid (6.03 g) and used for the next step without further purification. NH<sub>4</sub>OAc (2.26 g, 29.3 mmol), (**1**) (259 mg, 1.23 mmol) and phenylpyrimidine bis(pyridinium iodine) salt **7** (400 mg, 0.615 mmol) were suspended in methanol (20 mL) and heated under reflux for 30 min. A beige solid of 2,2'-BTP (**5**) precipitated in the heat and was centrifuged and dried under vacuum. Yield: 62.0% (236 mg, 0.382 mmol). <sup>1</sup>H NMR (500 MHz, 100 °C, TCE-d<sub>2</sub>):  $\delta$  9.81 (1H, s, H<sup>5</sup>), 9.37 (2H, d, <sup>4</sup>J = 1.5 Hz, H<sup>3''</sup> or H<sup>5''</sup>), 9.27 (2H, d, <sup>4</sup>J = 1.5 Hz, H<sup>3'''</sup> or H<sup>5'''</sup>), 8.94–8.84 (8H, m, H<sup>2'</sup>, H<sup>6'</sup>, H<sup>3''</sup>, H<sup>6''</sup> and H<sup>3'''</sup>), 8.15 (2H,

dt,  $^3J = 8.0$  Hz,  $^4J = 1.0$  Hz,  $H^{6''''}$ ), 7.99–7.94 (4H, m,  $H^{5''''}$  and  $H^{5''''}$ ), 7.69–7.65 (2H, m,  $H^{3'}$  and  $H^{5'}$ ), 7.65–7.60 (1H, m,  $H^{4'}$ ), 7.47–7.44 (4H, m,  $H^{4''''}$  and  $H^{4''''}$ );  $^{13}C$  NMR (500 MHz, 100 °C, TCE-d<sub>2</sub>):  $\delta$  164.7, 157.0, 156.4, 155.4, 155.2, 150.4, 149.5, 149.3, 138.5, 137.4, 136.8, 138.9, 129.0, 128.8, 124.2, 124.0, 121.7, 121.6, 120.6, 119.6, 112.6, 99.9 MALDI-TOF: calculated  $m/z$  for  $C_{40}H_{26}N_8$ :  $[M + H]^+$  619.67, found 619. 97; elemental analysis: calculated: %C 77.65, %H 4.24, %N 18.11; found: %C 77.25, %H 4.31, %N 17.99.

### 2,6-Dichloro-4-phenylpyridine (17).

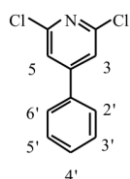

To 2,6-dichloro-4-aminopyridine (3.53 g, 21.7 mmol) and copper(I) oxide (3.89 g, 27.2 mmol), isoamylnitrite (11 mL) and dry benzene (150 mL) were added under Ar. The mixture was refluxed for 6 h. After cooling to rt, a solid was formed and filtered off. From the residual filtrate the solvent was removed. The residue was dissolved in  $CHCl_3$ /hexane (1:1, v:v) and purified by column chromatography. ( $CHCl_3$ /hexane (1:1, v:v), alumina,  $R_f = 0.8$ ) leading to **17** as a white solid. Yield: 30.2% (1.47 g, 6.58 mmol).  $^1H$  NMR (400 MHz,  $CDCl_3$ ):  $\delta$  7.61–7.58 (2H, m,  $H^{2'}$  and  $H^{6'}$ ), 7.53–7.50 (3H, m,  $H^{3'}$ ,  $H^{4'}$  and  $H^{5'}$ ), 7.47 (2H, s,  $H^3$  and  $H^5$ );  $^{13}C$  NMR (400 MHz,  $CDCl_3$ ):  $\delta$  153.9, 151.0, 135.7, 130.2, 129.4, 127.0, 120.8.

### 2,6-Diacetyl-4-phenylpyridine (18).

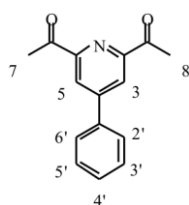

2,6-Dichloro-4-phenylpyridine (**17**) (1.48 g, 6.60 mmol), tributyl(1-ethoxyvinyl)stannane (5.29 g, 14.6 mmol), and  $Pd(PPh_3)_4$  (0.354 mg, 0.306 mmol) in dry DMF (50 mL) were refluxed for 20 h under Ar. After cooling to rt the reaction mixture was poured onto a mixture of KF (1.31 g, 22.6 mmol), distilled water (60 mL) and ether (60 mL) and stirred for 15 min. A grey solid was filtered off and slightly washed with ether. The filtrate was extracted three times with ether; the organic phases were collected and dried over  $MgSO_4$ . After removing the solvent the bis(enol ether) remained as a brown solid. The solid was dissolved in acetone and a few drops of HCl (1M) were added. After stirring for 24 h at rt and removing the solvent,  $CHCl_3$  and a saturated solution of  $NaHCO_3$  was added. The product was extracted

several times with  $\text{CHCl}_3$  and dried over  $\text{MgSO}_4$ . Removing the solvent delivered **18** as a beige-brown solid, which was recrystallized from methanol and dried under vacuum. Yield: 44.0% (694 mg, 2.90 mmol).  $^1\text{H}$  NMR (400 MHz,  $\text{CDCl}_3$ ):  $\delta$  8.47 (2H, s,  $\text{H}^3$  and  $\text{H}^5$ ), 7.74–7.70 (2H, m,  $\text{H}^{2'}$  and  $\text{H}^{6'}$ ), 7.49–7.56 (3H, m,  $\text{H}^{3'}$ ,  $\text{H}^{4'}$  and  $\text{H}^{5'}$ ), 2.84 (6H, s,  $\text{H}^7$  and  $\text{H}^8$ );  $^{13}\text{C}$  NMR (100 MHz,  $\text{CDCl}_3$ ):  $\delta$  199.7, 153.6, 150.8, 137.0, 130.1, 129.5, 127.3, 122.5, 25.9; MS (CI)  $m/z$  calculated for  $\text{C}_{15}\text{H}_{13}\text{NO}_2$ :  $[\text{M} + \text{H}]^+$ : 240.06  $[\text{M} + \text{H}]^+$ , found: 240.06; elemental analysis: calculated: %C 73.30, %H 5.48, %N 5.85; found: %C 73.66, %H 5.33, %N 5.84.

### Phenylpyridine bis(pyridinium iodine) salt **19**.

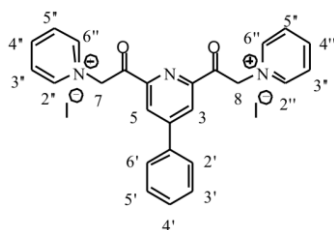

2,6-Diacetyl-4-phenylpyridine (**18**) (398 mg, 1.66 mmol) and iodine (942 mg, 3.71 mmol) in dry pyridine (7 mL) were refluxed under Ar for 4 h. After cooling to rt the product **19** as a beige solid was filtered off, cautiously washed with methanol, and dried under vacuum. Yield: 55.2% (478 mg, 0.916 mmol).  $^1\text{H}$  NMR (400 MHz,  $\text{DMSO-d}_6$ ):  $\delta$  9.13 (4H, d,  $^3J = 5.6$  Hz,  $\text{H}^{2''}$  and  $\text{H}^{6''}$ ) 8.80 (2H, t,  $^3J = 4.0$  Hz,  $\text{H}^{4''}$ ), 8.64 (2H, s,  $\text{H}^3$  and  $\text{H}^5$ ), 8.35 (4H, t,  $^3J = 3.2$  Hz,  $\text{H}^{3''}$  and  $\text{H}^{5''}$ ), 8.02–7.99 (2H, m,  $\text{H}^{2'}$  and  $\text{H}^{6'}$ ), 7.65–7.60 (3H, m,  $\text{H}^{3'}$ ,  $\text{H}^{4'}$  and  $\text{H}^{5'}$ ), 6.72 (4H, s,  $\text{H}^7$  and  $\text{H}^8$ ); MS (CI)  $m/z$  calculated for  $\text{C}_{25}\text{H}_{21}\text{I}_2\text{N}_3\text{O}_2$ : 240.27  $[\text{M}-2\text{I}-2\text{pyridine} + \text{H}]^+$ , found: 240.17; elemental analysis: calculated: %C 46.25, %H 3.26, %N :6.47; found: %C 45.93, %H 3.62, %N 6.77.

### 2,2'-PhSpPy (**14**).

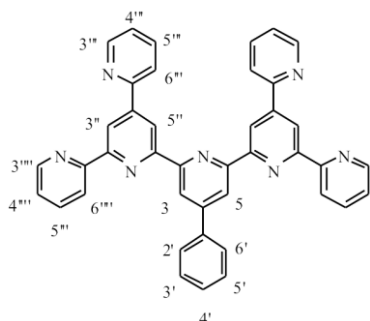

2,2'-Azachalcone **6** (65.2 mg, 0.310 mmol), phenylpyridine bis(pyridinium iodine) salt **19** (100 mg, 0.154 mmol) and  $\text{NH}_4\text{OAc}$  (700 mg, 9.09 mmol) were refluxed in methanol (6 mL) for 24 h. **14** precipitated as an off-white solid. It was filtered off, washed with methanol, and dried under vacuum. Yield: 26.1% (24.8 mg, 0.0402 mmol).  $^1\text{H}$  NMR (500 MHz, 100 °C,

TCE-d<sub>2</sub>):  $\delta$  9.46 (2H, d,  $^4J = 1.5$  Hz, H<sup>3''</sup> or H<sup>5''</sup>), 9.18 (2H, d,  $^4J = 1.5$  Hz, H<sup>3''</sup> or H<sup>5''</sup>), 9.00 (2H, s, H<sup>3</sup> and H<sup>5</sup>), 8.92–8.90 (2H, m, H<sup>3'''</sup>, H<sup>3''''</sup> or H<sup>6''''</sup>), 8.84–8.82 (2H, m, H<sup>3'''</sup>, H<sup>3''''</sup> or H<sup>6''''</sup>), 8.78–8.75 (2H, m, H<sup>3'''</sup>, H<sup>3''''</sup> or H<sup>6''''</sup>), 8.19 (2H, d,  $^3J = 8.0$  Hz, H<sup>6'''</sup>), 8.02 (2H, d,  $^3J = 8.0$  Hz, (H<sup>2'</sup> and H<sup>6'</sup>) or (H<sup>3'</sup> and H<sup>5'</sup>)), 7.97–7.92 (4H, m, H<sup>5''''</sup> and H<sup>5''''</sup>), 7.67 (2H, t,  $^3J = 7.5$  Hz, (H<sup>2'</sup> and H<sup>6'</sup>) or (H<sup>3'</sup> and H<sup>5'</sup>)), 7.59 (1H, t,  $^3J = 7.5$  Hz, H<sup>4'</sup>), 7.47–7.40 (4H, m, H<sup>4''''</sup> and H<sup>4''''</sup>); MALDI-TOF: calculated  $m/z$  for C<sub>41</sub>H<sub>27</sub>N<sub>7</sub>: 619.66 [M + 2H]<sup>+</sup>, found: 619.48; elemental analysis: calculated: %C 79.72, %H 4.41, %N 15.87; found: %C 79.48, %H 4.48, %N: 15.67.

### 2,3'-PhSpPy (13).

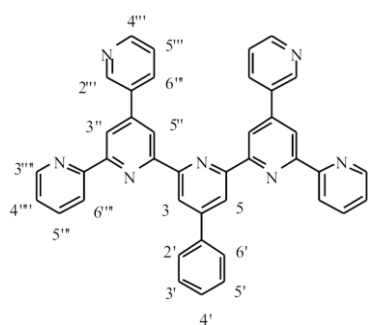

2,3'-Diazachalcone **9** (53.8 mg, 0.256 mmol), phenylpyridine bis(pyridinium iodine) salt **19** (76.0 mg, 0.117 mmol), and NH<sub>4</sub>OAc (550 mg, 7.14 mmol) were refluxed in methanol (7 mL) for 24 h. **13** precipitated as an off-white solid. It was filtered off, washed with methanol and dried under vacuum. Yield: 15.9% (11.5 mg, 0.0186 mmol). <sup>1</sup>H NMR (500 MHz, 100 °C, TCE-d<sub>2</sub>):  $\delta$  9.21–9.20 (2H, m, H<sup>3''</sup>, H<sup>5''</sup>, or H<sup>2''</sup>), 9.02 (2H, s, H<sup>3</sup> and H<sup>5</sup>), 9.00 (2H, d,  $^4J = 1.5$  Hz, H<sup>3''</sup>, H<sup>5''</sup>, or H<sup>2''</sup>), 8.86 (2H, d,  $^4J = 2.0$  Hz, H<sup>3''</sup>, H<sup>5''</sup>, or H<sup>2''</sup>), 8.82–8.80 (2H, m, H<sup>3''''</sup> or H<sup>6''''</sup>), 8.79 (2H, dd,  $^3J = 3.5$  Hz,  $^3J = 5.0$  Hz, H<sup>3''''</sup> or H<sup>6''''</sup>), 8.76 (2H, d,  $^3J = 8.0$  Hz, H<sup>4''''</sup>), 8.24 (2H, dt,  $^4J = 2.0$  Hz,  $^3J = 5.0$  Hz, H<sup>6'''</sup>), 8.01 (2H, d,  $^3J = 8.0$  Hz, (H<sup>2'</sup> and H<sup>6'</sup>) or (H<sup>3'</sup> and H<sup>5'</sup>)), 7.95 (2H, td,  $^4J = 1.5$  Hz,  $^3J = 7.5$  Hz, H<sup>5''''</sup>), 7.68 (2H, t,  $^3J = 7.5$  Hz, (H<sup>2'</sup> and H<sup>6'</sup>) or (H<sup>3'</sup> and H<sup>5'</sup>)), 7.61–7.58 (1H, m, H<sup>4'</sup>), 7.53 (2H, dd,  $^3J = 5.0$  Hz,  $^3J = 8.0$  Hz, H<sup>5''''</sup>), 7.42 (2H, ddd,  $^4J = 1.0$  Hz,  $^3J = 5.0$  Hz,  $^3J = 7.5$  Hz, H<sup>4''''</sup>); MALDI-TOF: calculated  $m/z$  for C<sub>41</sub>H<sub>27</sub>N<sub>7</sub>: 619.66 [M + 2H]<sup>+</sup>, found: 619.63; elemental analysis: calculated: %C 79.72, %H 4.41, %N 15.87; found: %C 79.46, %H 4.53, %N 15.90.

### 2,4'-PhSpPy (12).

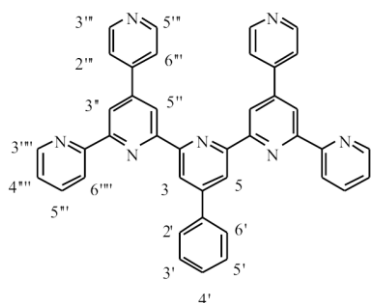

2,4'-Diazachalcone **10** (65.2 mg, 0.310 mmol), phenylpyridine bis(pyridinium iodine) salt **19** (100 mg, 0.154 mmol), and NH<sub>4</sub>OAc (700 mg, 9.09 mmol) were refluxed in methanol (6 mL) for 24 h. **12** precipitated as an off-white solid. It was filtered off, washed with methanol, and dried under vacuum. Yield: 11.4% (10.8 mg, 0.0176 mmol). <sup>1</sup>H NMR (500 MHz, 100 °C, TCE-d<sub>2</sub>): δ 9.51 (2H, s, H<sup>3''</sup> or H<sup>5''</sup>), 9.50 (2H, s, H<sup>3'''</sup> or H<sup>5'''</sup>), 8.76 (2H, d, <sup>3</sup>J = 4.5 Hz, H<sup>6''''</sup>), 8.59 (2H, s, H<sup>3</sup> and H<sup>5</sup>), 8.59–8.55 (2H, m, H<sup>3'''</sup>), 8.15–8.06 (6H, m, H<sup>2'</sup>, H<sup>6'</sup>, H<sup>3'''</sup>, and H<sup>5'''</sup>), 8.06 (4H, s, H<sup>2'''</sup> and H<sup>6'''</sup>), 7.79–7.77 (2H, m, H<sup>5'''</sup>), 7.66–7.63 (1H, m, H<sup>4'</sup>), 7.62–7.57 (4H, m, H<sup>3'</sup>, H<sup>5'</sup> and H<sup>4'''</sup>); MALDI-TOF: calculated *m/z* for C<sub>41</sub>H<sub>27</sub>N<sub>7</sub>: 619.66 [M + 2H]<sup>+</sup>, found: 619.57; elemental analysis: calculated: %C 79.72, %H 4.41, %N 15.87; found: %C 80.14, %H 4.34, %N 15.81.

### 3,3'-PhSpPy (15).

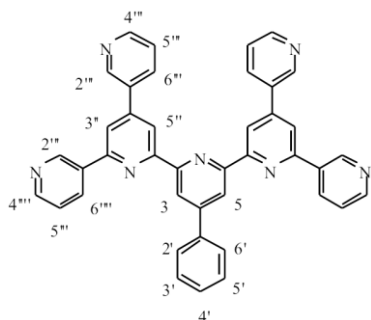

3,3'-Diazachalcone **11** (65.2 mg, 0.310 mmol), phenylpyridine bis(pyridinium iodine) salt **19** (100 mg, 0.154 mmol), and NH<sub>4</sub>OAc (700 mg, 9.09 mmol) were refluxed in methanol (6 mL) for 24 h. **15** precipitated as an off-white solid. It was filtered off, washed with methanol, and dried under vacuum. Yield: 17.3% (16.4 mg, 2.66 mmol). <sup>1</sup>H NMR (500 MHz, 100 °C, TCE-d<sub>2</sub>): δ 9.55 (2H, dd, <sup>5</sup>J = 0.5 Hz, <sup>4</sup>J = 2.0 Hz, H<sup>2'''</sup>), 9.15 (2H, dd, <sup>5</sup>J = 0.5 Hz, <sup>5</sup>J = 2.5 Hz, H<sup>2'''</sup>), 9.03 (2H, s, H<sup>3</sup> and H<sup>5</sup>), 8.95 (2H, d, <sup>4</sup>J = 1.5 Hz, H<sup>5''</sup>), 8.81 (2H, dd, <sup>4</sup>J = 1.5 Hz, <sup>3</sup>J = 5.0 Hz, H<sup>4'''</sup> or H<sup>4'''</sup>), 8.78 (2H, dd, <sup>4</sup>J = 1.5 Hz, <sup>3</sup>J = 5.0 Hz, H<sup>4'''</sup> or H<sup>4'''</sup>), 8.57 (2H, ddd, <sup>4</sup>J = 1.5 Hz, <sup>4</sup>J = 2.5 Hz, <sup>3</sup>J = 8.0 Hz, H<sup>6''''</sup>), 8.17 (2H, ddd, <sup>4</sup>J = 1.5 Hz, <sup>4</sup>J = 2.5 Hz, <sup>3</sup>J = 8.0 Hz, H<sup>6''''</sup>), 8.06 (2H, d, <sup>4</sup>J = 1.5 Hz, H<sup>3''</sup>), 8.00–7.98 (2H, m, (H<sup>2'</sup> and H<sup>6'</sup>) or (H<sup>3'</sup> and

H<sup>5'</sup>), 7.67–7.64 (2H, m, (H<sup>2'</sup> and H<sup>6'</sup>) or (H<sup>3'</sup> and H<sup>5'</sup>)), 7.60–7.58 (1H, m, H<sup>4'</sup>), 7.55 (2H, ddd, <sup>5</sup>J = 0.5 Hz, <sup>3</sup>J = 5.0 Hz, <sup>3</sup>J = 8.0 Hz, H<sup>5'''</sup> or H<sup>5''''</sup>), 7.53 (2H, ddd, <sup>5</sup>J = 0.5 Hz, <sup>3</sup>J = 5.0 Hz, <sup>3</sup>J = 8.0 Hz, H<sup>5'''</sup> or H<sup>5''''</sup>); MALDI-TOF: calculated *m/z* for C<sub>41</sub>H<sub>27</sub>N<sub>7</sub>: 619.66 [M + 2H]<sup>+</sup>, found: 619.68; elemental analysis: calculated: %C 79.72, %H 4.41, %N 15.87; found: %C 79.40, %H 4.62, %N 15.76.

#### 4,3'-PhSpPy (16).

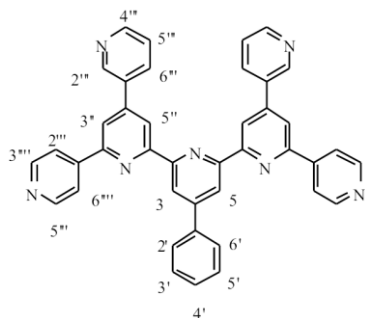

4,3'-Diazachalcone **8** (109 mg, 0.520 mmol), phenylpyridine bis(pyridinium iodine) salt **19** (158 mg, 0.243 mmol), and NH<sub>4</sub>OAc (948 mg, 12.3 mmol) were refluxed in methanol (7 mL) for 24 h. **16** precipitated as an off-white solid. It was filtered off, washed with methanol, and dried under vacuum. Yield: 37.9% (57.0 mg, 0.0923 mmol). <sup>1</sup>H NMR (500 MHz, 100 °C, TCE -d<sub>2</sub>): δ 9.15 (2H, d, <sup>4</sup>J = 2.0 Hz, H<sup>5'''</sup> or H<sup>2'''</sup>), 9.02 (2H, s, H<sup>3</sup> and H<sup>5</sup>), 8.99 (2H, d, <sup>4</sup>J = 1.5 Hz, H<sup>5''</sup> or H<sup>2''</sup>), 8.86 (4H, dd, <sup>4</sup>J = 1.5 Hz, <sup>3</sup>J = 4.5 Hz, H<sup>3''''</sup> and H<sup>5''''</sup>), 8.82 (2H, dd, <sup>4</sup>J = 1.5 Hz, <sup>3</sup>J = 5.0 Hz, H<sup>4''</sup>), 8.19–8.16 (6H, m, H<sup>6'''</sup>, H<sup>3''''</sup>, and H<sup>5''''</sup>), 8.11 (2H, d, <sup>4</sup>J = 1.5 Hz, H<sup>3''</sup>), 8.00–7.98 (2H, m, (H<sup>2'</sup> and H<sup>6'</sup>) or (H<sup>3'</sup> and H<sup>5'</sup>)), 7.69–7.66 (2H, m, (H<sup>2'</sup> and H<sup>6'</sup>) or (H<sup>3'</sup> and H<sup>5'</sup>)), 7.62–7.58 (1H, m, H<sup>4'</sup>), 7.57–7.54 (2H, m, H<sup>5'''</sup>); MALDI-TOF: calculated *m/z* for C<sub>41</sub>H<sub>27</sub>N<sub>7</sub>: 619.66 [M + 2H]<sup>+</sup>, found: 619.52; elemental analysis: calculated: %C 79.72, %H 4.41, %N 15.87; found: %C 79.70, %H 4.75, %N 15.85.

## STM

Zoomed STM images of 2,3'-PhSpPy (**13**) and 3,3'-PhSpPy (**15**):

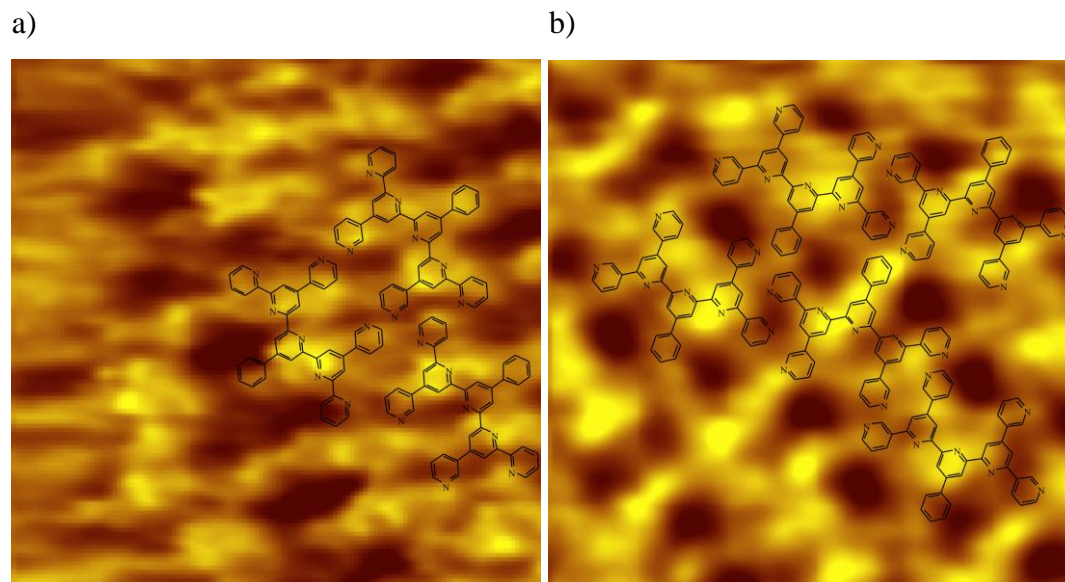

**Figure S1:** a)  $5 \times 5 \text{ nm}^2$  STM image ( $I_{\text{set}} = 2.10 \text{ nA}$ ,  $V_{\text{set}} = -600 \text{ mV}$ ) of 2,3'-PhSpPy (**13**) and b)  $5 \times 5 \text{ nm}^2$  STM image ( $I_{\text{set}} = 15.3 \text{ pA}$ ,  $V_{\text{set}} = -610 \text{ mV}$ ) of 3,3'-PhSpPy (**15**) at the HOPG/TCB interface with overlaid molecules.

## References

1. Ziener, U.; Lehn, J.-M.; Mourran, A.; Möller, M. *Chem.–Eur. J.* **2002**, *8*, 951–957.  
[doi:10.1002/1521-3765\(20020215\)8:4<951::AID-CHEM951>3.0.CO;2-9](https://doi.org/10.1002/1521-3765(20020215)8:4<951::AID-CHEM951>3.0.CO;2-9)
2. Zhang, Z.; Dong, Y.-W.; Wang, G.-W. *Chem. Lett.* **2003**, *32*, 966–967.  
[doi:10.1246/cl.2003.966](https://doi.org/10.1246/cl.2003.966)
3. Durinda, J.; Szücs, L.; Krasnec, L.; Heger, J.; Springer, V.; Kolena, J.; Keleti, J. *Acta Fac. Pharm. Bohem.* **1966**, *12*, 89–129.
4. Soderquist, J. A.; Hsu, G. J.-H. *Organometallics* **1982**, *1*, 830–833.  
[doi:10.1021/om00066a012](https://doi.org/10.1021/om00066a012)
5. Perrin, D. D.; Armarego, W. L. F. *Purification of Laboratory Chemicals*; Pergamon: Oxford, 1998.
6. Meier, C.; Ziener, U.; Landfester, K.; Weihrich, P. *J. Phys. Chem. B* **2005**, *109*, 21015–21027. [doi:10.1021/jp054271d](https://doi.org/10.1021/jp054271d)
